# Supplementary material
Source: Elsevier journal article supplement (https://rcastoragev2.blob.core.windows.net/b107f090e5378bc4978b0ca6b7daacbf/mmc1.pdf)
Supplement: mmc1 [file mmc1.pdf]

**Current Biology, Volume 27**

**Supplemental Information**

**Enhanced Depolymerization of Actin Filaments  
by ADF/Cofilin and Monomer Funneling by Capping  
Protein Cooperate to Accelerate Barbed-End Growth**

**Shashank Shekhar and Marie-France Carlier**

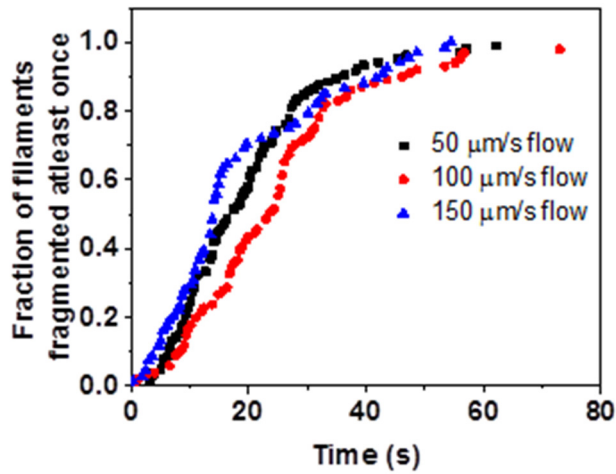

**Figure S1. ADF-induced fragmentation is not affected by flow (in range of flow-rates used here). Related to Figure 1.**

Frequency of ADF-induced fragmentation (at 5  $\mu\text{M}$  ADF) was seen to be independent of the flow-rate in the range 50  $\mu\text{M/s}$  to 150  $\mu\text{M/s}$  flows ( $n = 100$  filaments). ADF-induced depolymerization and fragmentation measurements were carried out at around 50  $\mu\text{M/s}$  flow rates.

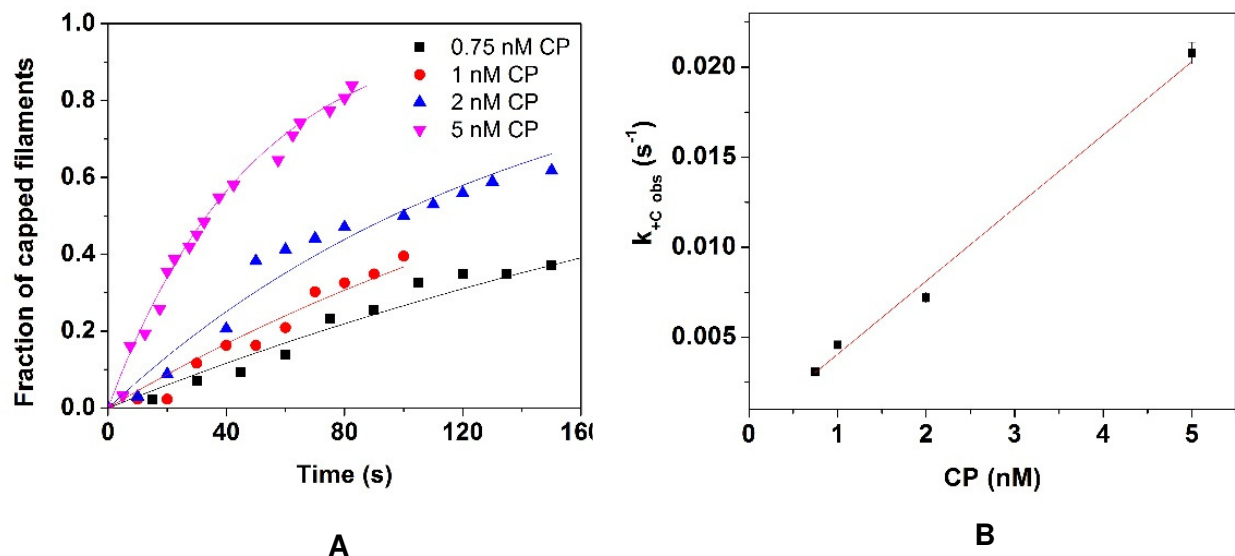

**Figure S2. Measurement of the association rate constant of CP to the barbed end ( $k_{+C}$ ). Related to Figure 3.**

**(A)** Measurement of association rate constant for CP for tracer barbed end. Increase in fraction of barbed ends being capped by Capping Protein ( $B + C \rightarrow BC$ ) in the presence of 0.75 nM (black), 1 nM (red), 2 nM (blue) and 5 nM (magenta) CP. Symbols are actual data and lines are exponential fits ( $n = 30\text{-}40$  filaments). **(B)** Linear fit of the relationship between observed on-rate of CP on CP concentration gives  $k_{+C} = 4.06 \pm 0.17 \mu\text{M}^{-1} \cdot \text{s}^{-1}$ .
